# Supplementary material
Source: PubMed Central journal article supplement (PMC2740467)

## Supplemental materials

### List of plasmids constructed in this study

1. **pGBK-T7-C-IPO13**: a yeast two-hybrid vector expressing a C-terminal fragment of imp13 (a.a. 307-963) as a bait in this study
2. **pIPO4-GST**: a bacterial vector expressing a GST tagged full-length human importin 4 (a.a. 1-1081)
3. **pIPO9-GST**: a bacterial vector expressing a GST tagged full-length mouse importin 9 (a.a. 1-1041)
4. **pARX-GST**: a bacterial vector expressing a GST tagged full-length mouse Arx (a.a.1-564)
5. **pARX-His<sub>6</sub>**: a bacterial vector expressing a His<sub>6</sub> tagged full-length mouse Arx (a.a.1-564)
6. **p Δ NLS1-ARX**: a mammalian vector expressing an EGFP-tagged mutant Arx lacking NLS1(a.a.82-89)
7. **p Δ NLS1-ARX-1**: a mammalian vector expressing an DsRed-tagged mutant Arx lacking NLS1(a.a.82-89)
8. **p Δ NLS2-ARX**: a mammalian vector expressing an EGFP-tagged mutant Arx lacking NLS2 (a.a. 327-388)
9. **p Δ NLS1/Δ NLS2-ARX**: a mammalian vector expressing an EGFP-tagged mutant Arx lacking either NLS1(a.a.82-89) and NLS2(a.a.327-388)
10. **pNLS2-1-ARX**: a mammalian vector expressing an EGFP-tagged mutant Arx lacking BC1 domain (a.a.327 to 334)
11. **pNLS2-2-ARX**: a mammalian vector expressing an EGFP-tagged mutant Arx lacking BC2 domain (a.a. 381 to 388)
12. **pNLS2-3-ARX**: a mammalian vector expressing an EGFP-tagged mutant Arx lacking a fragment from a.a. 327 to 380
13. **pNLS2-4-ARX**: a mammalian vector expressing an EGFP-tagged mutant Arx lacking a fragment from a.a. 335 to 388
14. **pNLS2-5-ARX**: a mammalian vector expressing an EGFP-tagged mutant Arx lacking a fragment from a.a. 335 to 380
15. **pNLS2-6-ARX**: a mammalian vector expressing an EGFP-tagged mutant Arx lacking BC1 domain and BC2 domain
16. **p Δ NLS1-1-ARX**: a mammalian vector expressing an EGFP-tagged mutant Arx lacking a fragment from a.a. 82 to 89 and a fragment from a.a.327 to 334
17. **p Δ NLS1-2-ARX**: a mammalian vector expressing an EGFP-tagged mutant Arx with deletions of a.a. 82-89 and a.a.381-388
18. **p Δ NLS1-3-ARX**: a mammalian vector expressing an EGFP-tagged mutant Arx with deletions of a.a.82-89 and a.a.327-380
19. **p Δ NLS1-4-ARX**: a mammalian vector expressing an EGFP-tagged mutant Arx with deletions of a.a.82-89 and a.a.335-388
20. **p Δ NLS1-5-ARX**: a mammalian vector expressing an EGFP-tagged mutant Arx with deletions of a.a.82-89 and a.a.335-380
21. **p Δ NLS1-6-ARX**: a mammalian vector expressing an EGFP-tagged mutant Arx with deletions of a.a.82-89, a.a.327-334 and a.a.381-388
22. **pK327A-ARX**: a mammalian vector expressing an EGFP-tagged mutant Arx with a substitution of lysine 327 by an alanine residue
23. **pR328A-ARX**: a mammalian vector expressing an EGFP-tagged mutant Arx with a substitution of arginine 328 by an alanine residue
24. **pK329A-ARX**: a mammalian vector expressing an EGFP-tagged mutant Arx with a substitution of lysine 329 by an alanine residue
25. **pR331A-ARX**: a mammalian vector expressing an EGFP-tagged mutant Arx with a substitution of arginine 331 by an alanine residue
26. **pR332A-ARX**: a mammalian vector expressing an EGFP-tagged mutant Arx with a substitution of arginine 332 by an alanine residue
27. **pR334A-ARX**: a mammalian vector expressing an EGFP-tagged mutant Arx with a substitution of arginine 334 by an alanine residue
28. **pR381A-ARX**: a mammalian vector expressing an EGFP-tagged mutant Arx with a substitution of arginine 381 by an alanine residue
29. **pR382A-ARX**: a mammalian vector expressing an EGFP-tagged mutant Arx with a substitution of arginine 382 by an alanine residue
30. **pK384A-ARX**: a mammalian vector expressing an EGFP-tagged mutant Arx with a substitution of lysine 384 by an alanine residue
31. **pR386A-ARX**: a mammalian vector expressing an EGFP-tagged mutant Arx with a substitution of arginine 386 by an alanine residue
32. **pK327A/ΔNLS1**: a mammalian vector expressing an EGFP-tagged ΔNLS1-Arx with a substitution of lysine 327 by an alanine residue
33. **pR328A/ΔNLS1**: a mammalian vector expressing an EGFP-tagged ΔNLS1-Arx with a substitution

- of arginine 328 by an alanine residue
34. **pK329A/ΔNLS1**: a mammalian vector expressing an EGFP-tagged ΔNLS1-Arx with a substitution of lysine 329 by an alanine residue
  35. **pR331A/ΔNLS1**: a mammalian vector expressing an EGFP-tagged ΔNLS1-Arx with a substitution of arginine 331 by an alanine residue
  36. **pR334A/ΔNLS1**: a mammalian vector expressing an EGFP-tagged ΔNLS1-Arx with a substitution of arginine 334 by an alanine residue
  37. **pR381A/ΔNLS1**: a mammalian vector expressing an EGFP-tagged ΔNLS1-Arx with a substitution of arginine 381 by an alanine residue
  38. **pR382A/ΔNLS1**: a mammalian vector expressing an EGFP-tagged ΔNLS1-Arx with a substitution of arginine 382 by an alanine residue
  39. **pK384A/ΔNLS1**: a mammalian vector expressing an EGFP-tagged ΔNLS1-Arx with a substitution of lysine 334 by an alanine residue
  40. **pR386A/ΔNLS1**: a mammalian vector expressing an EGFP-tagged ΔNLS1-Arx with a substitution of arginine 386 by an alanine residue
  41. **pGEX4T-2-VDR-EGFP**: a bacterial vector expressing a GST/EGFP-tagged truncated VDR (a.a. 4-232)

### Primers used in this study

| Plasmid                              |            | 5' primer oligo                | 3' primer oligo                 | Restriction enzyme sites |
|--------------------------------------|------------|--------------------------------|---------------------------------|--------------------------|
| pIPO4-GST                            |            | AAA gtcgac AATGGAGTCAGCCGGGCT  | AAA gggcccgc CTAGGAGAGGCCAGT    | Sal I /Not I             |
| pGEX4T-2-VDR-EGFP                    |            | CGCggatccATGGCGGCCAGCACTTCCCT  | CCCaaagcttGGTCAGCCAGGTGGGGCAGCA | BamHI /HindIII           |
| pIPO9-GST                            |            | TAT gtcgac AGAGCTCGGTACCGCAGCA | ATT gggcccgc TTAGATGCCGATAGTCT  | Sal I /Not I             |
| <b>Wild type Arx</b>                 |            |                                |                                 |                          |
| pARX-GST (a.a. 1-564)                |            | CGCggatccAGCAATCAGTACCAG       | CCGgaattcTGCACACCTCCTTG         | BamH I /EcoR I           |
| pARX-His <sub>6</sub> (a.a.1-564)    |            | CCGgaattcATGAGCAATCAGTAC       | CCGctcgagTTAGCACACCTC           | EcoR I /Xho I            |
| <b>Deletion mutants of Arx</b>       |            |                                |                                 |                          |
| pA-NLS2-EGFP (a.a. 327-392)          |            | CCGgaattcTAAGCGCAAACAGAGG      | AAAggatccGCCAGCCTTCTCCCG        | EcoR I /BamH I           |
| pN-ARX-1 (a.a. 1- 326)               |            | CGCctcgagCTATGAGCAATCAGTACC    | AAAgaattcGACAGCAGCCCCTCCTC      | Xho I / EcoR I           |
| <b>NLS mutants of Arx</b>            |            |                                |                                 |                          |
| pΔNLS1-ARX (Δ82-89)                  | N-terminal | CGCctcgagCTATGAGCAATCAGTACC    | CCCaaagcttGCAGGTGCAGCTCAGC      | Xho I /HindIII           |
| pΔNLS1-ARX-1 (Δ82-89)                | C-terminal | CCCaaagcttTTGGCCCGGGCGGGGGC    | CGCggatccTTAGCACACCTCCTTG       | HindIII/ BamH I          |
| pΔNLS2-ARX(Δ327-388)                 | N-terminal | CGCctcgagCTATGAGCAATCAGTACC    | AAAgaattcCAGCAGCCCCTCCTC        | Xho I / EcoR I           |
|                                      | C-terminal | CCGgaattcGCGCAGACCCACCC        | CGCggatccTTAGCACACCTCCTTG       | EcoR I /BamH I           |
| pΔNLS1/ΔNLS2-ARX (Δ82-89 & Δ327-388) | N-terminal | CGCctcgagCTATGAGCAATCAGTACC    | CCCaaagcttGCAGGTGCAGCTCAGC      | Xho I /HindIII           |
|                                      | C-terminal | CCCaaagcttTTGGCCCGGGCGGGGGC    | CGCggatccTTAGCACACCTCCTTG       | HindIII/ BamH I          |

|                                                     |            |                                                  |                                                  |                |
|-----------------------------------------------------|------------|--------------------------------------------------|--------------------------------------------------|----------------|
| pNLS2-1-ARX (△327-334)                              |            | CCGgaattcTACCACGTTACCAGT                         | CGCg gatccTTAGCACACCTCCTTG                       | EcoR I /BamH I |
| pNLS2-2-ARX (△381-388)                              |            | CGCctcgagCTATGAGCAATCAGTACC                      | CCGgaattcGCGTCTGGAACCAC                          | Xho I / EcoR I |
| pNLS2-3-ARX (△327-380)                              |            | CCGgaattcTCGTCGGGCCAAGTG                         | CGCg gatccTTAGCACACCTCCTTG                       | EcoR I /BamH I |
| pNLS2-4-ARX (△335-388)                              |            | CGCctcgagCTATGAGCAATCAGTACC                      | AAAgaattcGCGCGGTAGCGCCTC                         | Xho I / EcoR I |
| pNLS2-5-ARX (△335-380)                              | N-terminal | CGCctcgagCTATGAGCAATCAGTACC                      | AAAgaattcGCGCGGTAGCGCCTC                         | Xho I / EcoR I |
|                                                     | C-terminal | CCGgaattcTCGTCGGGCCAAGTG                         | CGCg gatccTTAGCACACCTCCTTG                       | EcoR I /BamH I |
| pNLS2-6-ARX<br>(△327-334 &△381-388)                 | N-terminal | CGCctcgagCTATGAGCAATCAGTACC                      | CGGggtaccGTTCTGGAACCAC                           | Xho I /KpnI    |
|                                                     | C-terminal | CGG ggtacc GCACAGACCCAC                          | CGCg gatccTTAGCACACCTCCTTG                       | KpnI/ BamH I   |
| pΔNLS1-1-ARX ( △82-89 &△327-334)                    |            | CCGgaattcTACCACGTTACCAGT                         | CGCg gatccTTAGCACACCTCCTTG                       | EcoR I /BamH I |
| pΔNLS1-2-ARX<br>(△82-89 &△381-388)                  |            | CGCctcgagCTATGAGCAATCAGTACC                      | CCGgaattcGCGTCTGGAACCAC                          | Xho I / EcoR I |
| pΔNLS1-3-ARX<br>(△82-89 & △327-380)                 |            | CCGgaattcTCGTCGGGCCAAGTG                         | CGCg gatccTTAGCACACCTCCTTG                       | EcoR I /BamH I |
| pΔNLS1-4-ARX<br>(△82-89 & △335-388)                 |            | CGCctcgagCTATGAGCAATCAGTACC                      | AAAgaattcGCGCGGTAGCGCCTC                         | Xho I / EcoR I |
| pΔNLS1-5-ARX (△82-89 &<br>△335-380)                 | N-terminal | CGCctcgagCTATGAGCAATCAGTACC                      | AAAgaattcGCGCGGTAGCGCCTC                         | Xho I / EcoR I |
|                                                     | C-terminal | CCGgaattcTCGTCGGGCCAAGTG                         | CGCg gatccTTAGCACACCTCCTTG                       | EcoR I /BamH I |
| pΔNLS1-6-ARX<br>(△ 82-89 & △ 327-334 &<br>△381-388) | N-terminal | CGCctcgagCTATGAGCAATCAGTACC                      | CGGggtaccGTTCTGGAACCAC                           | Xho I /KpnI    |
|                                                     | C-terminal | CGG ggtacc GCACAGACCCAC                          | CGCg gatccTTAGCACACCTCCTTG                       | KpnI/ BamH I   |
| <b>Point-mutations in Arx, ΔNLS1-Arx and C-Arx</b>  |            |                                                  |                                                  |                |
| K327A-ARX, K327A/ΔNLS1<br>R328A-ARX, R328A/ΔNLS1    |            | AGGAGGGGCTGCTGGCGCGCAA<br>TGCTGAAGGCCAAACAGAGGCG | TTGCGCGCCAGCAGCCCCTCCT<br>CGCCTCTGTTTGGCCTTCAGCA |                |

|                                 |                               |                               |  |
|---------------------------------|-------------------------------|-------------------------------|--|
| K329A-ARX, K329A/ $\Delta$ NLS1 | TGAAGCGCGCGCAGAGGCGCTA        | TAGCGCCTCTGCGCGCGCTTCA        |  |
| R331A-ARX, R331A/ $\Delta$ NLS1 | CGCAAACAGGCGCGCTACCGCA        | TGCGGTAGCGCGCCTGTTTGCG        |  |
| R332A-ARX, R332A/ $\Delta$ NLS1 | AAACAGAGGGCCTACCGCACCA        | TGGTGCGGTAGGCCCTCTGTTT        |  |
| R334A-ARX, R334A/ $\Delta$ NLS1 | AGAGGCGCTACGCCACCACGTTACCAAGT | ACTGGTGAACGTGGTGGCGTAGCGCCTCT |  |
| R381A-ARX, R381A/ $\Delta$ NLS1 | GGTTCCAGAACGCACGGGCCAA        | TTGGCCCGTGC GTTCTGGAACC       |  |
| R382A-ARX, R382A/ $\Delta$ NLS1 | TCCAGAACCGTGCGGCCAAGTG        | CACTTGGCCGCACGGTTCTGGA        |  |
| K384A-ARX, K384A/ $\Delta$ NLS1 | GTCGGGCCGCGTGGCGCAAG          | CTTGCGCCACGCGGCCCGAC          |  |
| R386A-ARX, R386A/ $\Delta$ NLS1 | CAAGTGGGCGAAGCGGGAGA          | TCTCCCGCTTCGCCCACTTG          |  |

## Figure and its legend

**Imp4 is able to mediate the import of VDR into nuclei of digitonin-permeabilized cells.** HeLa cells were permeabilized with digitonin, incubated for 30 min with the import mixtures at 30°C, washed and fixed. As shown, EGFP-Arx-His<sub>6</sub> is imported into the nuclei in the presence of impβ1 (**b**) but not imp4 (**e**). EGFP-Arx-His<sub>6</sub> was not found in nuclei in the absence of impβ1 (**a**). By contrast, the GST/EGFP-tagged VDR fragment (a.a. 4-232), a known cargo of imp4 (50), was imported into the nuclei of permeabilized cells in the presence of imp4 (**g**). This recombinant protein was not found in the nuclei when imp4 was absent (**f**). At 4 °C, neither impβ1 nor imp4 could transport their cargo into the nuclei (**c**, **h**). A rim signal that indicates binding to the nuclear pore complexes is visible in both cases (**c**, **h**). "-" means without importin, "+" means with importin.

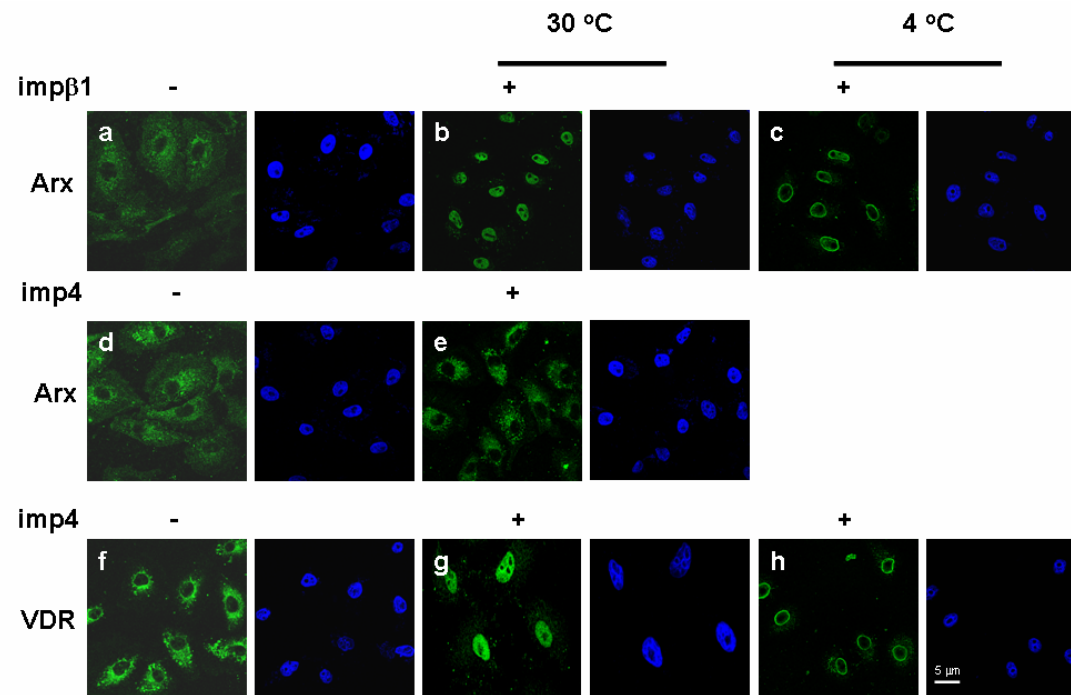

Supplement: supp_M109.004242_Suppl.pdf [file supp_M109.004242_Suppl.pdf]
